# Supplementary material for: Molecular Dynamics Simulations in Designing DARPins as Phosphorylation-Specific Protein Binders of ERK2
Source: MDPI journal article supplement (doi:10.3390/molecules26154540), 2021-07-27
Supplement: s1 [file s1]

*Table S1.* Comparison predicted  $\Delta\Delta G$  (kcal/mol) mutants of 3ZU7 from different web- based algorithms.

| $\Delta\Delta G$ Prediction kcal /mol) | MAESTRO | Dynamut | mCSM   | SDM    | DUET   |
|----------------------------------------|---------|---------|--------|--------|--------|
| A443D                                  | -0.325  | -0.154  | -0.551 | 0.100  | -0.255 |
| S380L                                  | -0.285  | 2.495   | -0.463 | 1.430  | 0.114  |
| A443N                                  | -0.232  | 0.169   | -0.215 | 0.090  | -0.048 |
| N422A                                  | -0.517  | 0.005   | -0.501 | 1.800  | 0.301  |
| N422T                                  | -0.608  | 0.400   | -0.078 | -0.650 | 0.185  |
| N422I                                  | -0.484  | -0.151  | -0.020 | 0.970  | 0.557  |
| S380I                                  | -0.209  | 2.300   | -0.463 | 1.700  | 0.176  |
| D421I                                  | -0.240  | 1.173   | 0.369  | 0.480  | 0.804  |
| I389D                                  | -0.827  | -0.036  | 0.088  | -0.790 | 0.395  |
| I389W                                  | -0.672  | -0.117  | -0.592 | 0.150  | -0.468 |
| I389T                                  | -0.522  | -0.106  | -0.541 | -1.270 | -0.383 |
| D454W                                  | -0.317  | 0.136   | -0.102 | -0.090 | -0.230 |
| D421W                                  | -0.428  | 1.879   | 0.198  | -0.840 | -0.151 |

Note: Mutation prediction from servers MAESTRO, Dynamut, mCSM (mutation Cutoff Scanning Matrix), SDM (Site Directed Mutator) and DUET. \*For MAESTRO,  $\Delta\Delta G < 0$  indicates stabilizing mutations while for Dynamut, SDM, mCSM and DUET servers,  $\Delta\Delta G > 0$  indicates stabilizing mutations.
